# Supplementary material for: Effect of the silkworm pupa protein–glucose conjugate on the thermal stability and antioxidant activity of anthocyanins
Source: Royal Society of Chemistry journal article supplement (doi:10.1039/d1fo00333j), 2021-01-01
Supplement: d1fo00333j1.pdf [file d1fo00333j1.pdf]

**Table S1.** Spectral shift in the secondary structure of silkworm pupae protein (Spp, 0.2 mg/ml), silkworm pupae protein- glucose conjugate (Spp-Glu, 0.2 mg/mL), and cyanidin-3-O-glucoside (C3G, 60  $\mu$ M) binding with Spp and Spp-Glu determined by Fourier transform infrared (FTIR) analysis.

| <b>Samples</b> | <b>Amide I (<math>\text{cm}^{-1}</math>)</b> | <b>Amide II (<math>\text{cm}^{-1}</math>)</b> |
|----------------|----------------------------------------------|-----------------------------------------------|
| Spp            | 1658.49                                      | 1546.63                                       |
| Spp+C3G        | 1652.70                                      | 1538.92                                       |
| Spp-Glu        | 1650.77                                      | 1546.63                                       |
| Spp-Glu+C3G    | 1643.06                                      | 1542.78                                       |
